# Supplementary material
Source: Springer Nature journal article supplement (https://www.springermedizin.de/resource/supplementary/12881_2005_92_MOESM1_ESM.pdf/9452400)

# Patient H

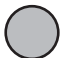

|         |    |    |
|---------|----|----|
| D6S1719 | 4  | 4  |
| D6S264  | 1  | 1  |
| D6S281  | 2  | 2  |
| D6S446  | 2  | 2  |
| D6S1590 | 4  | 4  |
| TBP     | 47 | 47 |

# Family A

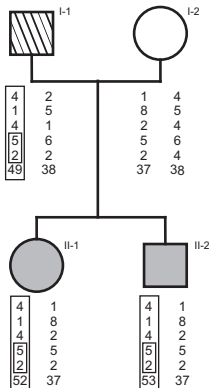

# Family B

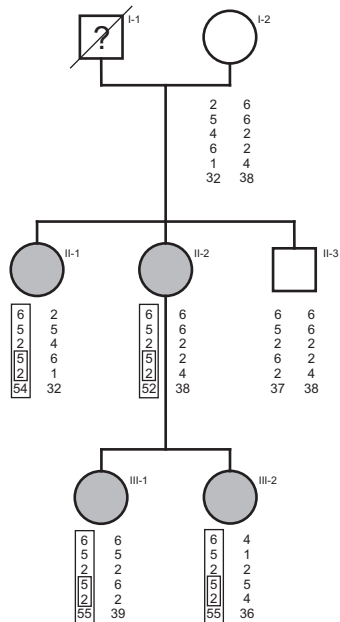

Supplement: MOESM1 [file 9452400]
